# Supplementary material for: Dissecting the Thermodynamics of ATP Binding to GroEL One Nucleotide at a Time
Source: PubMed Central journal article supplement (PMC10037461; doi:10.1021/acscentsci.2c01065), 2023-02-20
Supplement: oc2c01065_si_001.pdf [file oc2c01065_si_001.pdf]

**Supplemental Information**

**Dissecting the Thermodynamics of ATP Binding to GroEL One Nucleotide at a Time**

**Thomas Walker,<sup>1</sup> He Mirabel Sun,<sup>1</sup> Tiffany Gunnels,<sup>3</sup> Vicki Wysocki,<sup>2</sup> Arthur Laganowsky,<sup>1</sup> Hays Rye,<sup>3</sup> and David Russell<sup>1\*</sup>**

<sup>1</sup> Department of Chemistry, Texas A&M University, College Station, TX 77843

<sup>2</sup> Department of Chemistry and Biochemistry, The Ohio State University, Columbus, OH 43210

<sup>3</sup> Department of Biochemistry & Biophysics, Texas A&M University, College Station, TX 77843

\*Corresponding author, email: russell@chem.tamu.edu

| <b>Table of Contents</b> |                                                                             | <b>Page</b> |
|--------------------------|-----------------------------------------------------------------------------|-------------|
| <b>Table S1</b>          | <b>ATP assignment statistics</b>                                            | <b>S2</b>   |
| <b>Figure S1</b>         | <b>Mole fraction vs ATP concentration plots</b>                             | <b>S2</b>   |
| <b>Figure S2</b>         | <b>Van't Hoff plots for GroEL-ATP<sub>n</sub> binding</b>                   | <b>S3</b>   |
| <b>Figure S3</b>         | <b>Change in <math>\Delta G</math> in response to change in temperature</b> | <b>S4</b>   |
| <b>Figure S4</b>         | <b>Van't Hoff plots for GroEL-ADP<sub>n</sub> binding</b>                   | <b>S5</b>   |
| <b>Figure S5</b>         | <b>Representative spectra of GroEL-ATP<sub>n</sub> binding</b>              | <b>S6</b>   |
| <b>Figure S6</b>         | <b>Representative spectra of GroEL-ADP<sub>n</sub> binding</b>              | <b>S7</b>   |

**Table S1. ATP assignment statistics.** Average mass shift and error associated with the assignment of each [ATP + Mg<sup>2+</sup>] (theoretical mass is ~531 Da) binding.

| ATP # | Average Mass Shift (Da) | Standard Deviation ( $\pm$ Da) | % Error |
|-------|-------------------------|--------------------------------|---------|
| 1     | 548.6                   | 18.4                           | 3.31%   |
| 2     | 551.5                   | 20.0                           | 3.87%   |
| 3     | 536.5                   | 3.9                            | 1.04%   |
| 4     | 538.7                   | 2.4                            | 1.44%   |
| 5     | 539.7                   | 16.0                           | 1.63%   |
| 6     | 522.5                   | 26.6                           | 1.61%   |
| 7     | 531.4                   | 6.6                            | 0.07%   |
| 8     | 539.9                   | 14.5                           | 1.67%   |
| 9     | 542.4                   | 3.0                            | 2.15%   |
| 10    | 539.1                   | 8.0                            | 1.53%   |
| 11    | 519.1                   | 26.4                           | 2.25%   |
| 12    | 523.7                   | 8.3                            | 1.37%   |
| 13    | 527.4                   | 6.9                            | 0.67%   |
| 14    | 551.6                   | 17.6                           | 3.89%   |

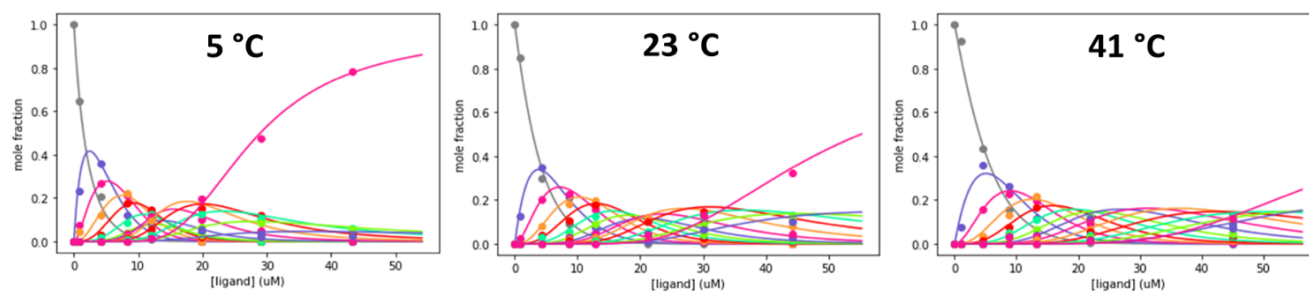

**Figure S1. Mole fraction vs ATP concentration plots are used to calculate the  $K_d$  values.** Three temperatures are shown and the n=14 binding event (pink line) is shown to decrease in relative abundance as temperature is increased.

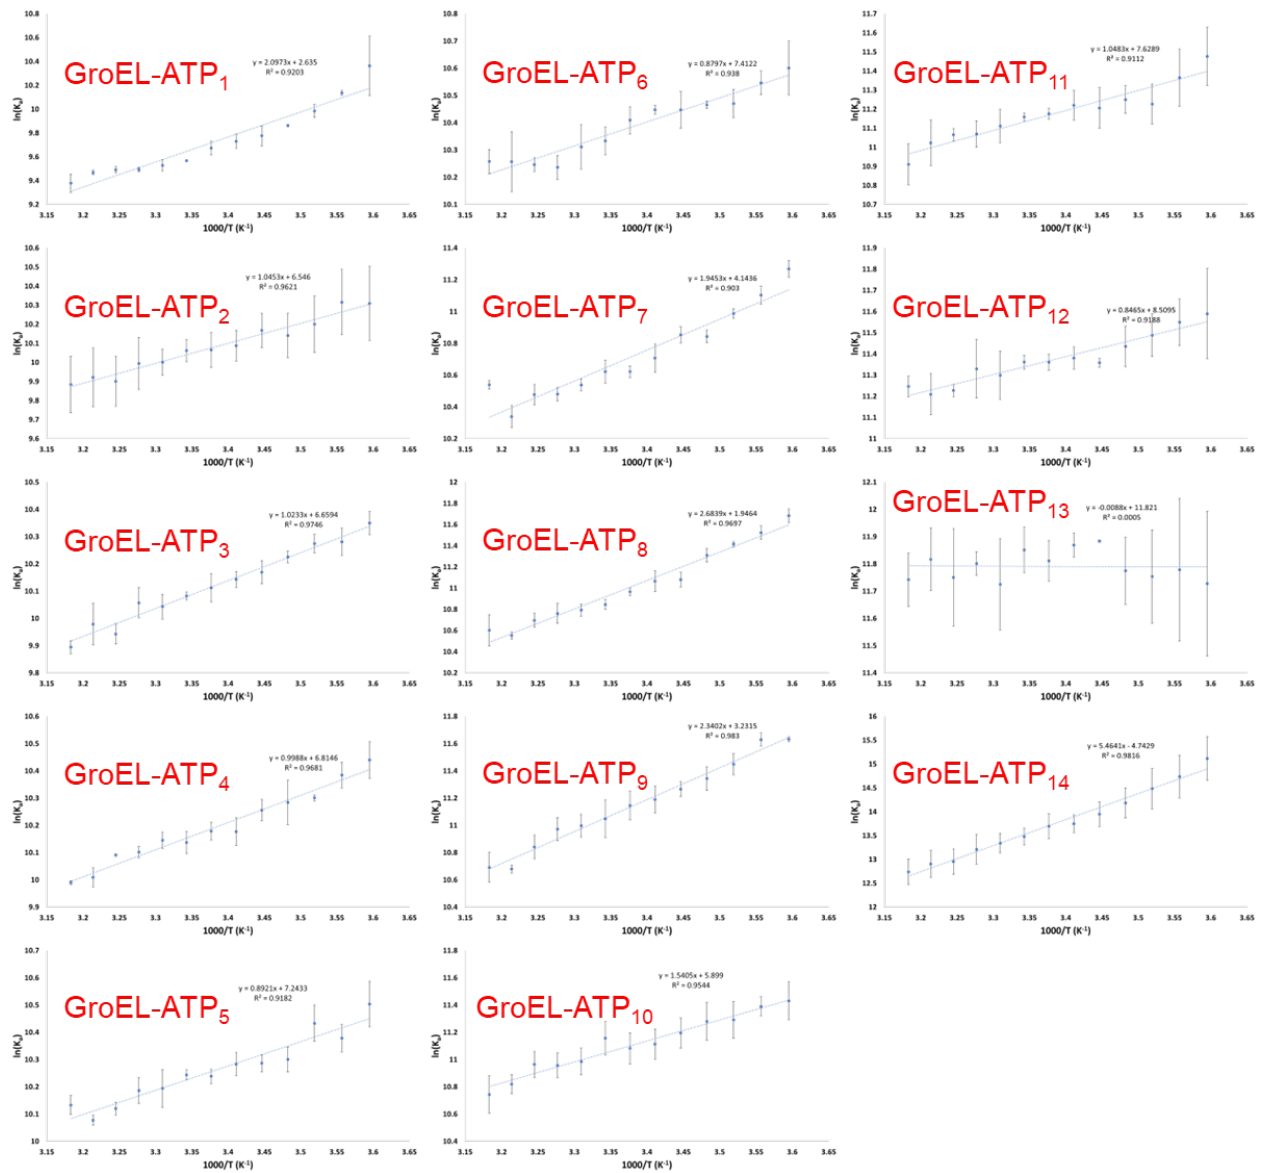

Figure S2. Van't Hoff plots for GroEL-ATP<sub>n</sub> binding in 200 mM EDDA ( $K_a$  vs  $1000/T$  (K)).

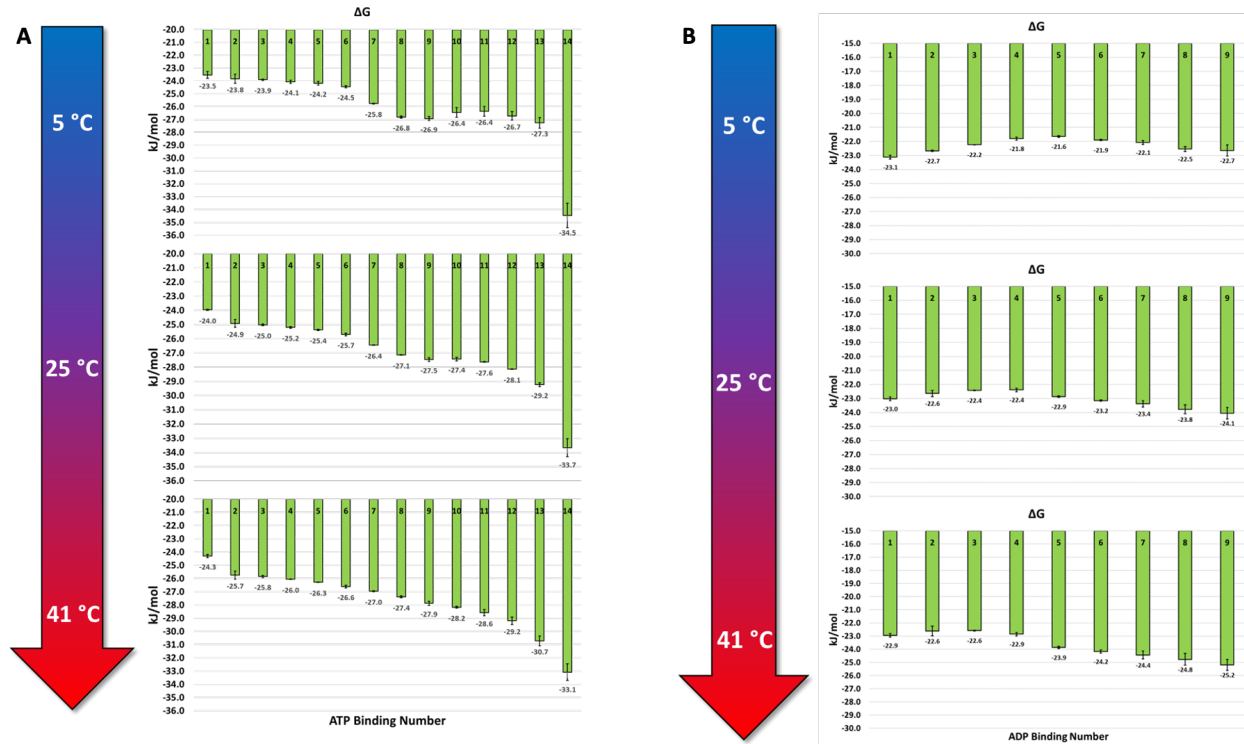

**Figure S3. Changes in  $\Delta G$  at various temperatures. (A)** Stacked plots displaying the change in  $\Delta G$  in response to change in temperature for GroEL-ATPn in EDDA. As the solution temperature increases, the bimodality observed for the sequential ATP binding becomes diminished; **(B)** Stacked plots displaying the Change in  $\Delta G$  in response to change in temperature for GroEL-ADPn in AmAc.

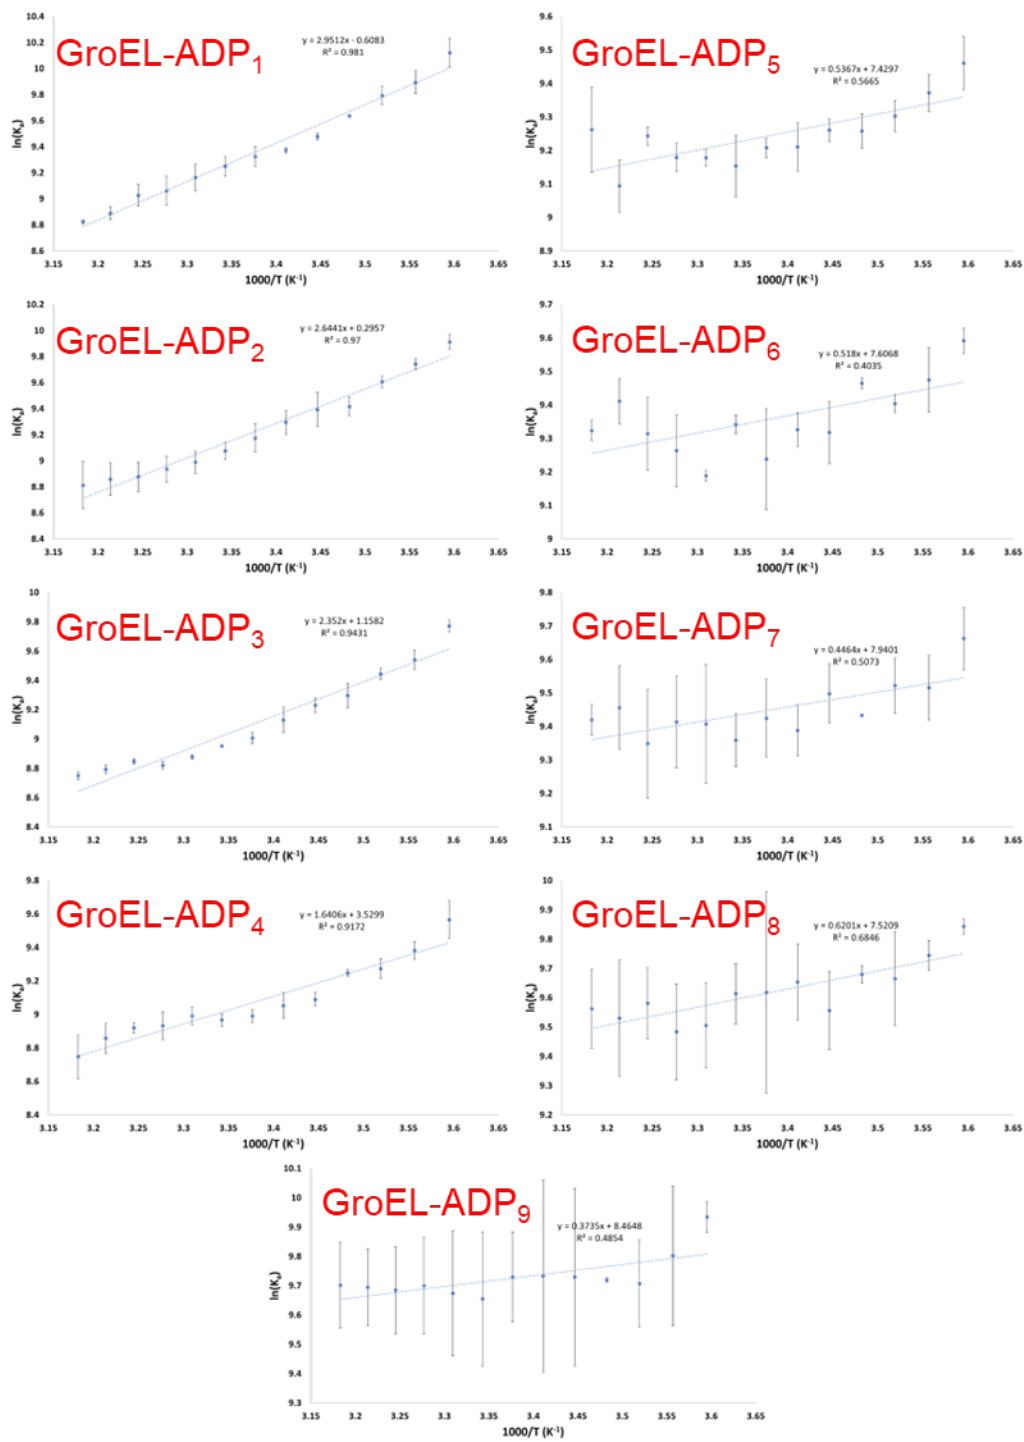

**Figure S4. Van't Hoff plots for GroEL-ADP<sub>n</sub> binding in 200 mM AmAc ( $K_a$  vs  $1000/T$  (K)). Note: ATP was added to the solution but only ADP binding was observed.**

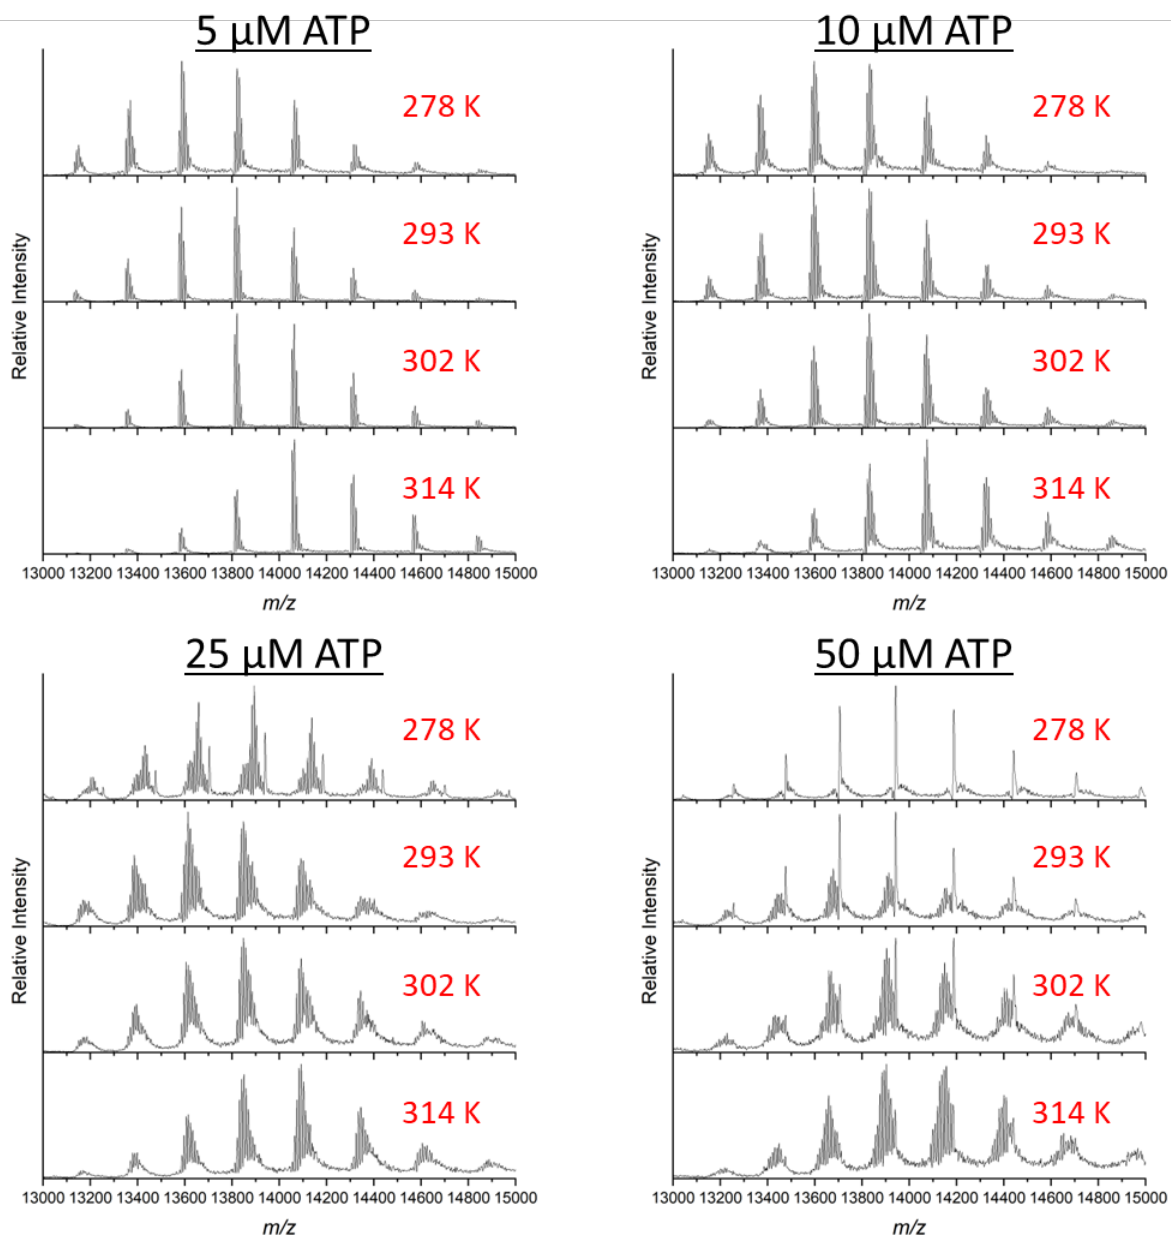

**Figure S5. Representative spectra of GroEL-ATPn binding** at various temperatures and ATP concentrations. Overall, ATP binding signals were well resolved as demonstrated above. Solution conditions are 500 nM GroEL, 200 mM EDDA, 1 mM MgAc<sub>2</sub>, and binding various concentrations of ATP.

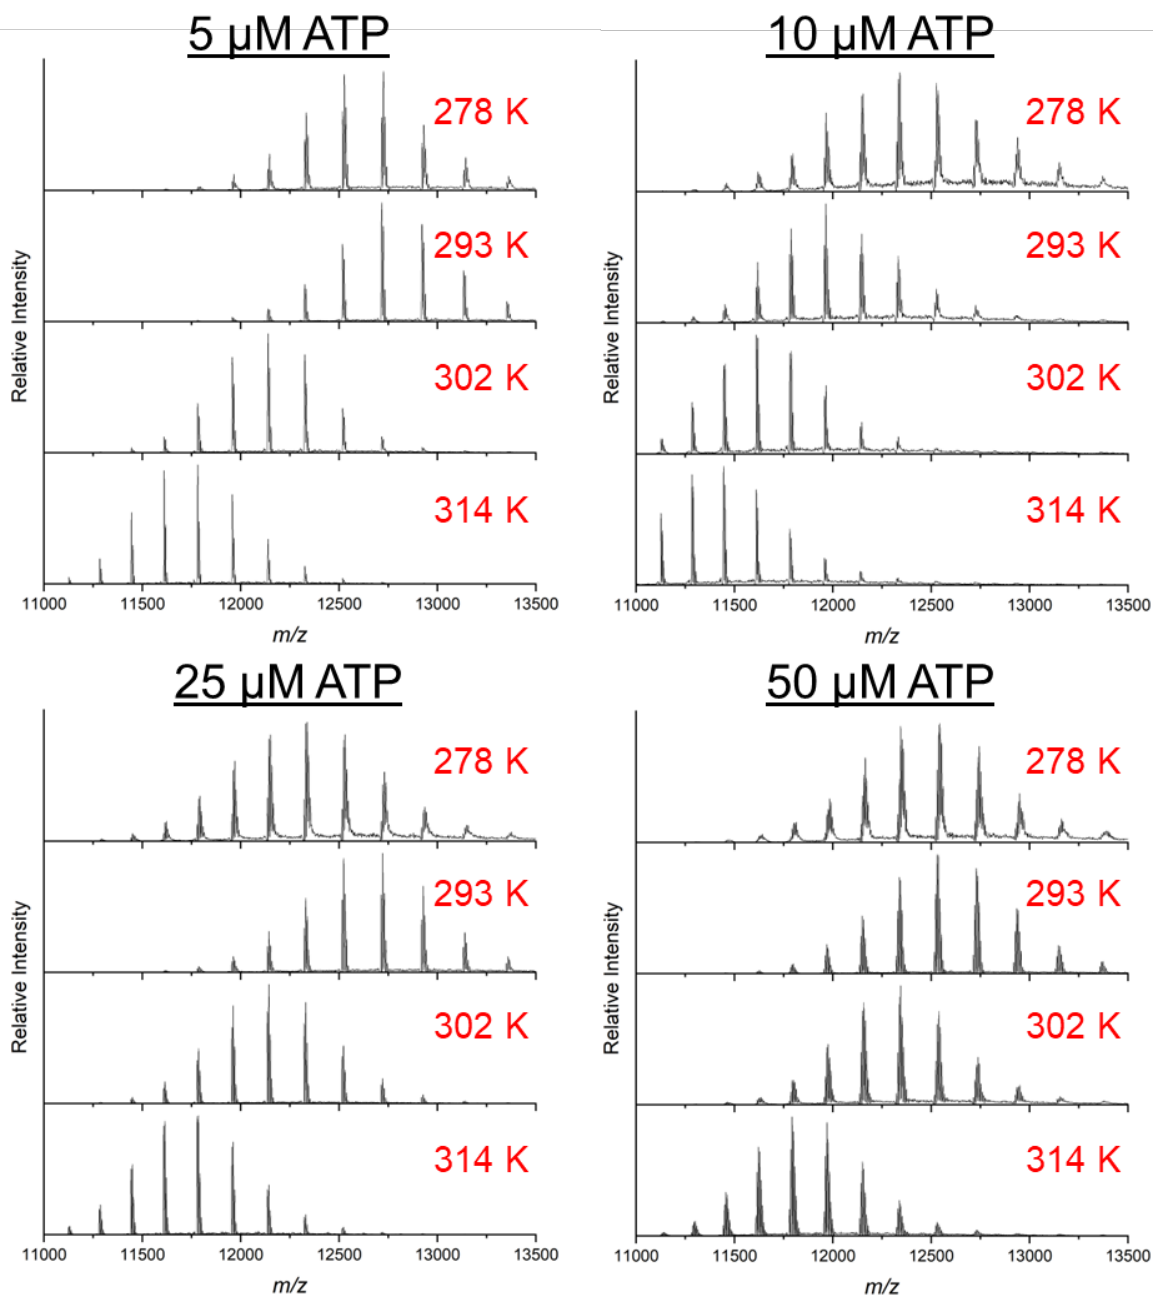

**Figure S6. Representative spectra of GroEL-ADPn binding** at various temperatures and ATP concentrations. Overall, ATP binding signals were well resolved as demonstrated above. Solution conditions are 500 nM GroEL, 200 mM AmAc, 1 mM MgAc<sub>2</sub>, and various concentrations of ATP. Note: ATP was added to the solution by only ADP binding was observed.
